# Supplementary material for: ABHD4-Regulating RNA Panel: Novel Biomarkers in Acute Coronary Syndrome Diagnosis
Source: MDPI journal article supplement (doi:10.3390/cells10061512), 2021-06-16
Supplement: s1 [file s1]

## Article

# ABHD4-Regulating RNA Panel: Novel Biomarkers in Acute Coronary Syndrome Diagnosis

Sara H.A. Agwa <sup>1,\*</sup>, Sherif Samir Elzahwy <sup>2</sup>, Mahmoud Shawky El Meteini <sup>3</sup>, Hesham Elghazaly <sup>4</sup>, Maha Saad <sup>5</sup>, Aya M. Abd Elsamee <sup>6</sup>, Rania Shamekh <sup>7</sup> and Marwa Matboli <sup>8,\*</sup>

<sup>1</sup> Clinical pathology and Molecular Genomics Unit, Medical Ain Shams Research Institute (MASRI), Faculty of Medicine, Ain Shams University, Cairo 11382, Egypt

<sup>2</sup> Cardiovascular Medicine Department, Faculty of Medicine, Ain Shams University, Cairo 1382, Egypt; Dr.sherifelzahwy@med.asu.edu.eg

<sup>3</sup> Department of General Surgery, the School of Medicine, University of Ain Shams, Cairo 11382, Egypt; mahmoud\_elmeteini@med.asu.edu.eg

<sup>4</sup> Oncology Department, Medical Ain Shams Research institute (MASRI), Faculty of Medicine, Ain Shams University, Cairo 11382, Egypt; heshamelghazaly@med.asu.edu.eg

<sup>5</sup> Biochemistry Department, Faculty of Medicine, Modern University for Technology and Information, Cairo 11382, Egypt; maha.saad@medicine.mti.edu.eg

<sup>6</sup> Biochemistry and Molecular Genomics Unit, Medical Ain Shams Research Institute (MASRI), Faculty of Medicine, Ain Shams University, Cairo 11382, Egypt; aya\_ana2025@yahoo.com

<sup>7</sup> Department of Pathology, University of South Florida, Tampa, FL 33620, USA; Rania.shamekh@gmail.com

<sup>8</sup> Medicinal Biochemistry and Molecular Biology Department, Faculty of Medicine, Ain Shams University, Cairo 11382, Egypt

\* Correspondence: sara.h.agwa@med.asu.edu.eg (S.H.A.A.); drmarwa\_matboly@med.asu.edu.eg (M.M.)

## Methodology Details

We have used the following products: U6 sn RNA, TaqMan<sup>™</sup> microRNA Control Assay 5X (RT: 001973), hsa-miR-221 TaqMan<sup>™</sup> Advanced miRNA Assay 5X (RT: 00052), hsa-miR-197 TaqMan<sup>™</sup> Advanced miRNA Assay 5X (RT: 000497), ABHD4 TaqMan<sup>™</sup> Gene Expression Assay (FAM) (HS01040459-m1) (Thermo Fisher Scientific, Inc, Waltham, MA, USA), Human FENDRR RT2 lncRNA qPCR Assay (LPH26005A-200), and Hs-ACTB-1-RT2 QuantiTect Primer Assays (Cat. No. QT00095431) (Qiagen, Germany).

**Table S1.** Study Population Demographic and Clinical Characteristics (*n* = 110).

|                                  | Acute myocardial infarction | Non-cardiac chest pain | Control         |
|----------------------------------|-----------------------------|------------------------|-----------------|
| Overall                          | 68                          | 21                     | 21              |
| Type of ACS                      |                             |                        |                 |
| Unstable angina ( <i>n</i> = 21) |                             |                        |                 |
| STEMI ( <i>n</i> = 31)           | 21 (30.9%)                  | 0%                     | 0%              |
| Non STEMI ( <i>n</i> = 16)       | 31 (45.6%)                  | 0%                     | 0%              |
| $\chi^2$ ( <i>p</i> )            | 16 (23.5)                   | 0%                     | 0%              |
| Age                              |                             |                        |                 |
| Mean $\pm$ S.D                   | 55.7 $\pm$ 11.7             | 56.7 $\pm$ 10.7        | 54.6 $\pm$ 10.2 |
|                                  |                             | .225 (.779)            |                 |
| F( <i>p</i> )                    |                             |                        |                 |
| Sex                              |                             |                        |                 |
| Male ( <i>n</i> = 87)            | 54 (79.4%)                  | 16 (72.2%)             | 17 (81%)        |
| Female ( <i>n</i> = 23)          | 14 (20.6%)                  | 5 (23.8%)              | 4 (19%)         |
|                                  |                             | .155 (0.925)           |                 |
| $\chi^2$ ( <i>p</i> )            |                             |                        |                 |
| Smoking                          |                             |                        | 15 (71.4%)      |

|                                  |                    |                   |                  |
|----------------------------------|--------------------|-------------------|------------------|
| Positive ( <i>n</i> = 75)        | 47 (69.1%)         | 13 (61.9%)        | 6 (28.6%)        |
| Negative ( <i>n</i> = 35)        | 21 (30.9%)         | 8 (38.15%)        |                  |
| $\chi^2$ ( <i>p</i> )            | .511 (0.75)        |                   |                  |
| <u>Hypertension</u>              |                    |                   |                  |
| Positive ( <i>n</i> = 34)        | 23 (33.8%)         | 5 (23.8%)         | 6 (28.6%)        |
| Negative ( <i>n</i> = 76)        | 45 (66.2%)         | 16(67.2%)         | 15 (71.4%)       |
| $\chi^2$ ( <i>P</i> )            | .820 (0.664)       |                   |                  |
| <u>Diabetes Mellitus</u>         |                    |                   |                  |
| Positive ( <i>n</i> = 38)        | 24 (35.5%)         | 5 (23.8%)         | 9 (42.9%)        |
| Negative ( <i>n</i> = 72)        | 44(64.7%)          | 16 (67.2%)        | 12 (56.1%)       |
| $\chi^2$ ( <i>p</i> )            | 1.729 (0.421)      |                   |                  |
| <u>Onset of chest pain</u>       |                    |                   |                  |
| Mean $\pm$ S.D                   | 6.8 $\pm$ 1.077    | 6.22 $\pm$ 1.023  | 0.00             |
| F ( <i>p</i> )                   | 0.604 (.523)       |                   |                  |
| <u>Body mass index</u>           |                    |                   |                  |
| Mean $\pm$ S.D                   | 27.2 $\pm$ 3.9     | 26.6 $\pm$ 2.6    | 25.4 $\pm$ 1.7   |
| F ( <i>p</i> )                   | 5.03 (0.008)       |                   |                  |
| <u>TG (-mg/dL)</u>               |                    |                   |                  |
| Mean $\pm$ S.D                   | 132.09 $\pm$ 44.66 | 66 $\pm$ 29.04    | 71.1 $\pm$ 28.8  |
| F ( <i>p</i> )                   | 33.5 (0.000)       |                   |                  |
| <u>HDL (-mg/dL)</u>              |                    |                   |                  |
| Mean $\pm$ S.D                   | 31.7 $\pm$ 6.4     | 33.2 $\pm$ 7.5    | 33.4 $\pm$ 9.3   |
| F ( <i>p</i> )                   | 0.671(0.53)        |                   |                  |
| <u>LDL (-mg/dL)</u>              |                    |                   |                  |
| Mean $\pm$ S.D                   | 128.19 $\pm$ 28.3  | 119.8 $\pm$ 25.5  | 124.7 $\pm$ 28.2 |
| F ( <i>p</i> )                   | 1.35 (0.262)       |                   |                  |
| <u>Cholesterol (-mg/dL)</u>      |                    |                   |                  |
| Mean $\pm$ S.D                   | 211.9 $\pm$ 33.2   | 201.19 $\pm$ 32.3 | 201.4 $\pm$ 28.3 |
| F ( <i>p</i> )                   | 1.408 (0.249)      |                   |                  |
| <u>Serum Creatinine (-mg/dL)</u> |                    |                   |                  |
| Mean $\pm$ S.D                   | 1.827 $\pm$ 1.9    | 0.95 $\pm$ 0.38   | 1.1 $\pm$ 0.3    |
| F ( <i>p</i> )                   | 3.04 (0.037)       |                   |                  |

S.D.: Standard Deviation,  $\chi^2$ : Chi-Square test, *p*: level of significance, F: One Way Anova test.

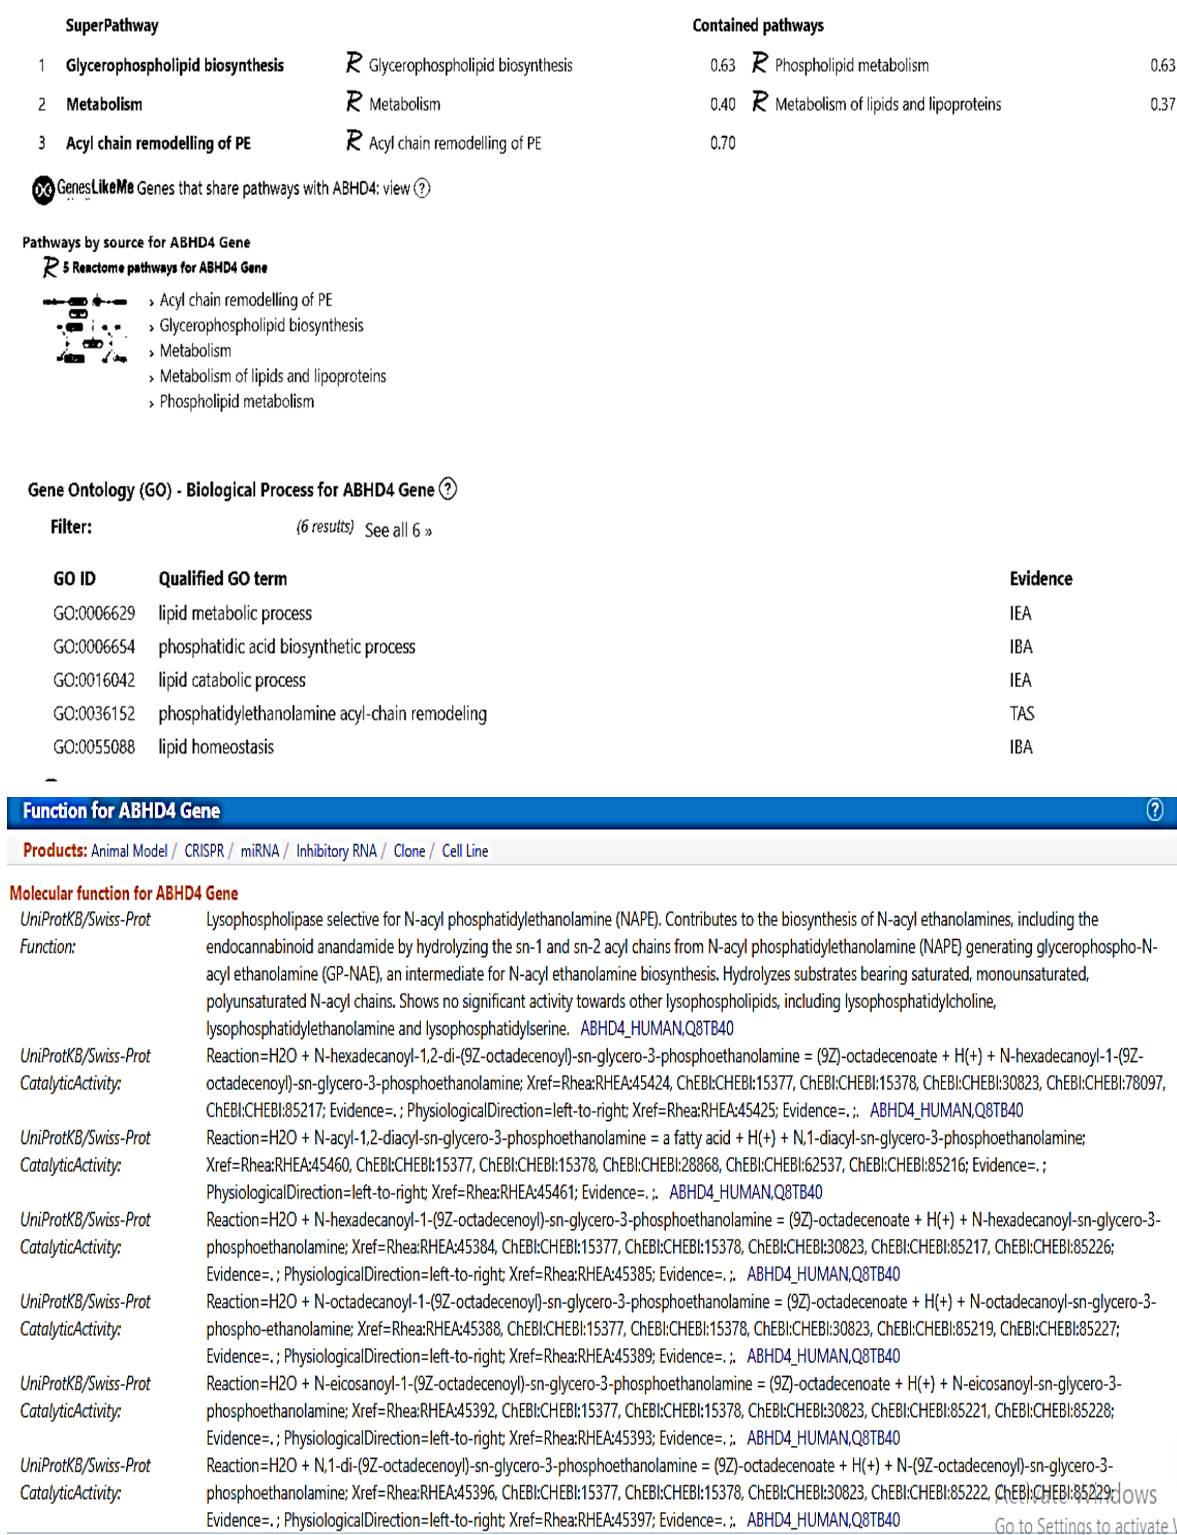

**Figure S1.** Gene ontology of ABHD4 mRNA by KEGG map that was retrieved from GeneCards®: The Human Gene Database. It shows that ABHD4 mRNA is linked specifically to phospholipid metabolism. Available at (<https://www.genecards.org/cgi-bin/carddisp.pl?gene=ABHD4>, accessed on 21 May 2021)).

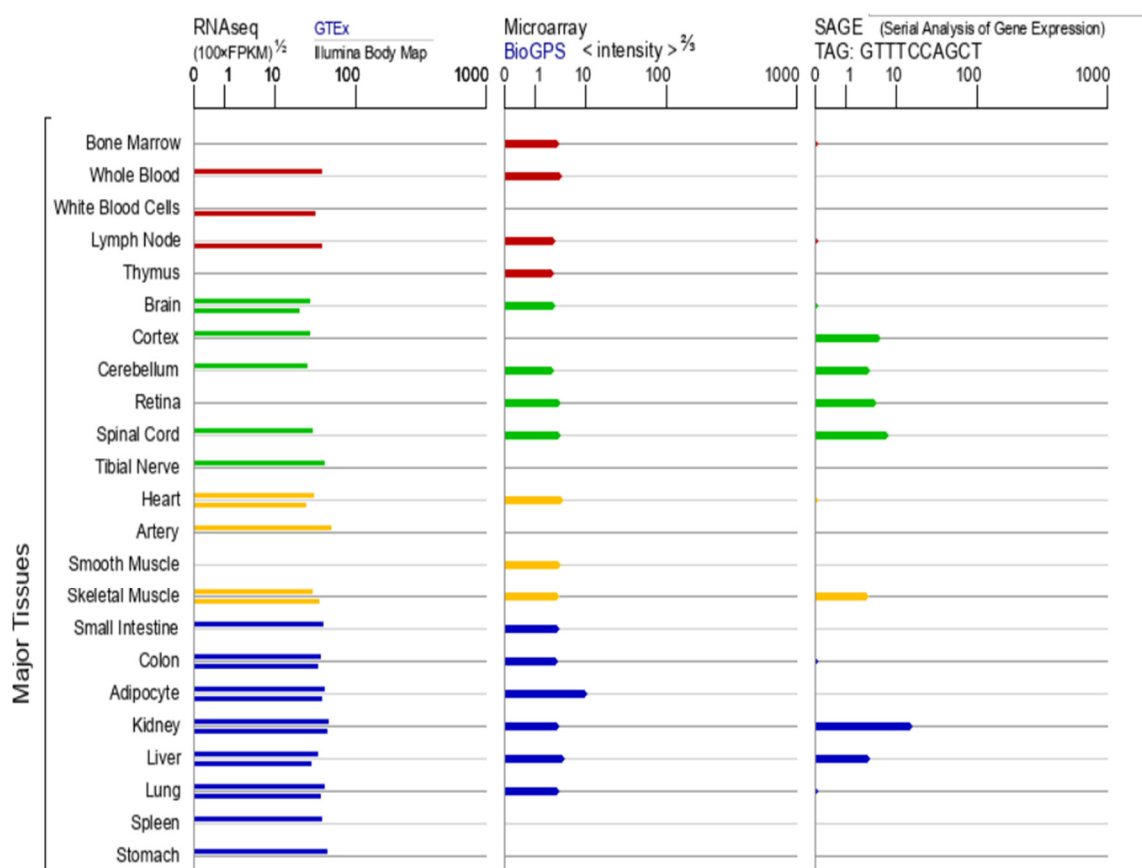

**Figure S2:** Gene expression of ABHD4 mRNA in heart that was retrieved from GeneCards®: The Human Gene Database. It shows basal RNA expression in normal heart. Available at (<https://www.genecards.org/cgi-bin/carddisp.pl?gene=ABHD4>, (accessed on 27 May 2021)). X-axis represents level of RNA expression while Y-axis represents the tissue in which the gene is expressed.

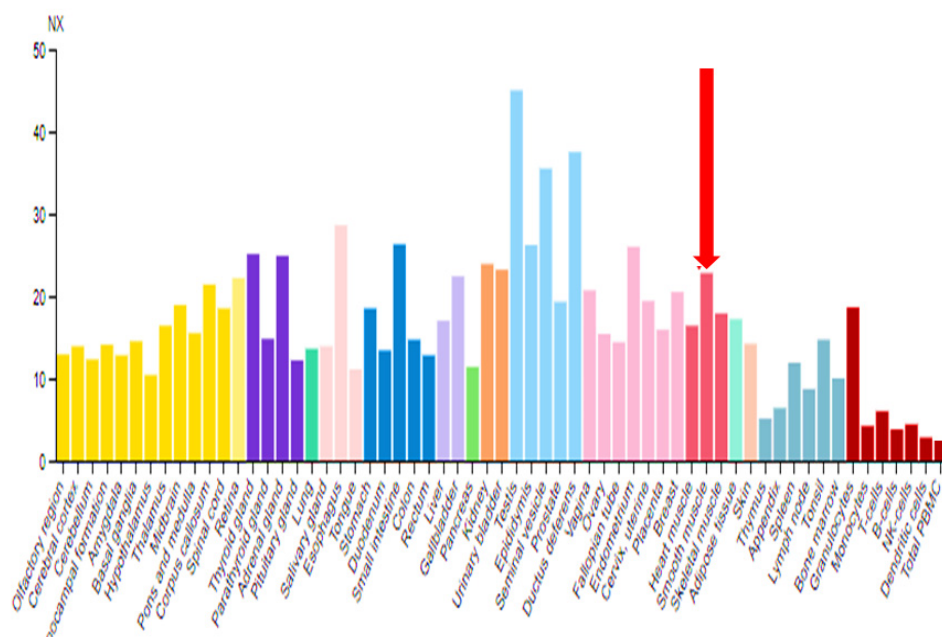

**Figure S3.** Gene expression of ABHD4 mRNA in heart that was retrieved from The Human Protein Atlas database. It shows the basal expression of ABHD4 mRNA in heart. The red arrow refers to the level of ABHD4 mRNA expression in normal heart. Y-axis represents level of RNA expression while X-axis represents the tissue in which the gene is expressed.

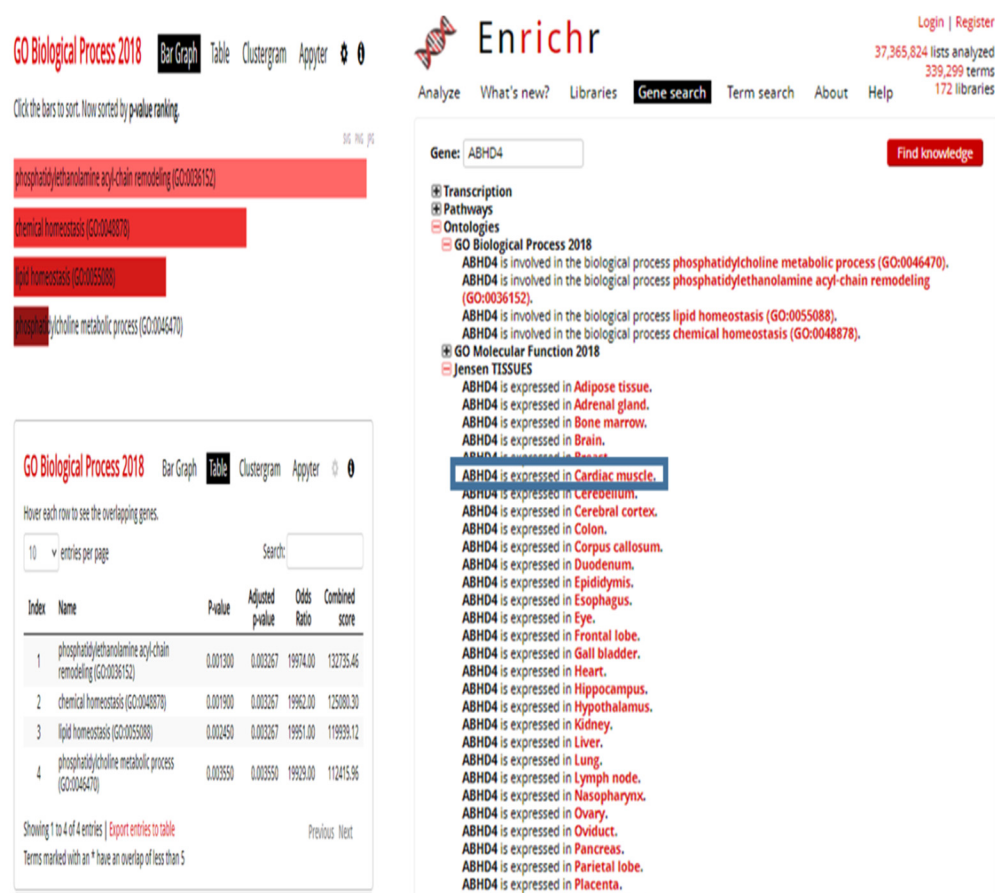

**Figure S4.** Gene ontology and expression of ABHD4 mRNA in heart that was retrieved from Enrichr tool (<https://maayanlab.cloud/Enrichr/> (accessed on 1 June 2021)). It shows the expression of ABHD4 mRNA in heart and its link to phospholipid metabolism.

|   | SuperPathway                               | Contained pathways                                                                                                                                                                                                                                                                                                                         |      |                                                                                                                                                                                                                                                                                                                    |      |
|---|--------------------------------------------|--------------------------------------------------------------------------------------------------------------------------------------------------------------------------------------------------------------------------------------------------------------------------------------------------------------------------------------------|------|--------------------------------------------------------------------------------------------------------------------------------------------------------------------------------------------------------------------------------------------------------------------------------------------------------------------|------|
| 1 | ADP signalling through P2Y purinoceptor 12 | <div><div></div>ADP signalling through P2Y purinoceptor 12</div> <div><div></div>G-protein activation</div>                                                              | 0.73 | <div><div></div>Cooperation of PDCL (PhLP1) and TRiC/CCT in G-protein beta folding</div> <div><div></div>G alpha (z) signalling events</div> | 0.57 |
| 2 | DAG and IP3 signaling                      | <div><div></div>PLC beta mediated events</div> <div><div></div>G-protein mediated events</div>                                                                           | 0.65 | <div><div></div>Opioid Signalling</div> <div><div></div>G Protein Signaling Pathways</div>                                                   | 0.45 |
| 3 | GABA receptor activation                   | <div><div></div>Activation of GABAB receptors</div> <div><div></div>GABA B receptor activation</div>                                                                     | 0.71 | <div><div></div>GABA receptor activation</div>                                                                                                                                                                                  | 0.56 |
| 4 | Signaling by GPCR                          | <div><div></div>GPCR downstream signaling</div> <div><div></div>Signaling by GPCR</div>                                                                                  | 0.76 | <div><div></div>Signal Transduction</div>                                                                                                                                                                                       | 0.44 |
| 5 | Transmission across Chemical Synapses      | <div><div></div>Neurotransmitter Receptor Binding And Downstream Transmission In The Postsynaptic Cell</div> <div><div></div>Transmission across Chemical Synapses</div> | 0.67 | <div><div></div>Neuronal System</div>                                                                                                                                                                                           | 0.71 |

### Gene Ontology (GO) - Biological Process for MIR197 Gene (?)

Filter:  (3 results)

| GO ID      | Qualified GO term                                                   | Evidence |
|------------|---------------------------------------------------------------------|----------|
| GO:0032701 | negative regulation of interleukin-18 production                    | IDA      |
| GO:0035195 | gene silencing by miRNA                                             | IDA,IEA  |
| GO:1900015 | regulation of cytokine production involved in inflammatory response | IDA      |

**Figure S5.** Pathway enrichment analysis of miR-197 by KEGG map that was retrieved from GeneCards®: The Human Gene Database (<https://www.genecards.org/cgi-bin/carddisp.pl?gene=MIR197> (accessed on 25 May 2021)). It clarifies the role of miRNA-197 in inflammatory response and diacyl glycerol (DAG) and lipid metabolism that is closely linked to myocardial ischemia.

| Items 1 - 25 of 45 < Prev Page 1 of 2 Next >                                                  |               |                        |
|-----------------------------------------------------------------------------------------------|---------------|------------------------|
| Process                                                                                       | Evidence Code | Pubs                   |
| <a href="#">gene silencing by miRNA</a>                                                       | IDA           | <a href="#">PubMed</a> |
| <a href="#">gene silencing by miRNA</a>                                                       | IEA           |                        |
| <a href="#">gene silencing by miRNA</a>                                                       | IGI           | <a href="#">PubMed</a> |
| <a href="#">gene silencing by miRNA</a>                                                       | IMP           | <a href="#">PubMed</a> |
| <a href="#">miRNA mediated inhibition of translation</a>                                      | IDA           | <a href="#">PubMed</a> |
| <a href="#">miRNA mediated inhibition of translation</a>                                      | IMP           | <a href="#">PubMed</a> |
| <a href="#">negative regulation by host of viral genome replication</a>                       | ISS           |                        |
| <a href="#">negative regulation of ERK1 and ERK2 cascade</a>                                  | IDA           | <a href="#">PubMed</a> |
| <a href="#">negative regulation of TRAIL-activated apoptotic signaling pathway</a>            | IDA           | <a href="#">PubMed</a> |
| <a href="#">negative regulation of TRAIL-activated apoptotic signaling pathway</a>            | IMP           | <a href="#">PubMed</a> |
| <a href="#">negative regulation of apoptotic process</a>                                      | IDA           | <a href="#">PubMed</a> |
| <a href="#">negative regulation of apoptotic process</a>                                      | IMP           | <a href="#">PubMed</a> |
| <a href="#">negative regulation of cell adhesion molecule production</a>                      | IGI           | <a href="#">PubMed</a> |
| <a href="#">negative regulation of cell migration involved in sprouting angiogenesis</a>      | IGI           | <a href="#">PubMed</a> |
| <a href="#">negative regulation of cell population proliferation</a>                          | IDA           | <a href="#">PubMed</a> |
| <a href="#">negative regulation of cytokine production involved in inflammatory response</a>  | ISS           |                        |
| <a href="#">negative regulation of double-strand break repair</a>                             | IDA           | <a href="#">PubMed</a> |
| <a href="#">negative regulation of hematopoietic stem cell proliferation</a>                  | IDA           | <a href="#">PubMed</a> |
| <a href="#">negative regulation of heterotypic cell-cell adhesion</a>                         | IDA           | <a href="#">PubMed</a> |
| <a href="#">negative regulation of inflammatory response</a>                                  | IGI           | <a href="#">PubMed</a> |
| <a href="#">negative regulation of interleukin-21 production</a>                              | IDA           | <a href="#">PubMed</a> |
| <a href="#">negative regulation of leukocyte adhesion to vascular endothelial cell</a>        | IGI           | <a href="#">PubMed</a> |
| <a href="#">negative regulation of necroptotic process</a>                                    | IDA           | <a href="#">PubMed</a> |
| <a href="#">negative regulation of sprouting angiogenesis</a>                                 | IGI           | <a href="#">PubMed</a> |
| <a href="#">negative regulation of vascular associated smooth muscle cell differentiation</a> | IMP           | <a href="#">PubMed</a> |

**Figure S6.** Pathway enrichment analysis of miR-221-3p by KEGG map that was retrieved from <https://www.ncbi.nlm.nih.gov/gene/407006> (accessed on 28 May 2021). It clarifies the role of miRNA-221 in inflammatory response and apoptosis that is closely linked to myocardial ischemia.



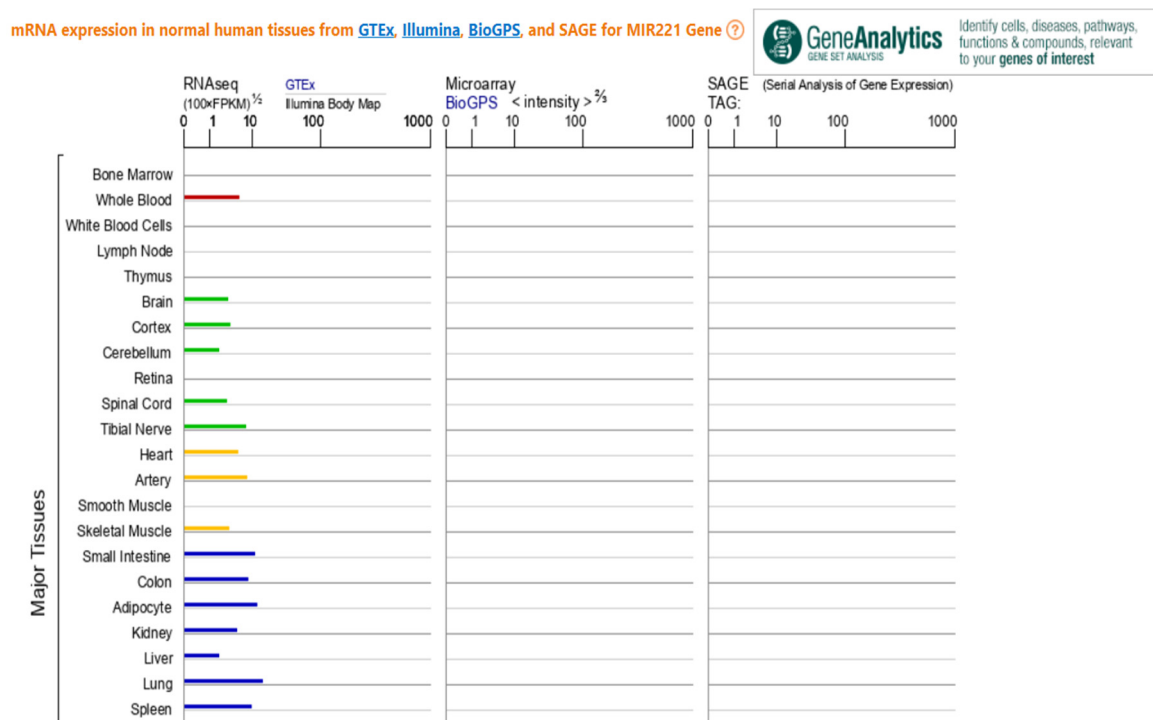

**Figure S7:** Gene expression of miRNA-221-3p in heart that was retrieved from GeneCards®: The Human Gene Database. Available at (<https://www.genecards.org/cgi-bin/carddisp.pl?gene=MIR221> (accessed on 1 June 2021)). It shows the basal expression of miRNA-221 in normal heart. X-axis represents level of RNA expression while Y-axis represents the tissue in which the gene is expressed.

| Mirna △         | Refseqid △ | Genesymbol △ | Score △ | Position △ | Binding Site △ | Au △ | Me △    | N Pairings △ | Targetscan △ | Mirdb △ | Mirtarbase △ |
|-----------------|------------|--------------|---------|------------|----------------|------|---------|--------------|--------------|---------|--------------|
| hsa-miR-197-5p  | NM_022060  | ABHD4        | 0.92    | 3UTR       | 2221,2257      | 0.41 | -5.036  | 20           | –            | –       | –            |
| hsa-miR-197-5p  | NM_022060  | ABHD4        | 0.85    | 3UTR       | 1144,1168      | 0.52 | -6.937  | 19           | –            | –       | –            |
| hsa-miR-197-5p  | NM_022060  | ABHD4        | 1.00    | 3UTR       | 1994,2016      | 0.43 | -9.552  | 18           | –            | –       | –            |
| hsa-miR-197-3p  | NM_022060  | ABHD4        | 1.00    | 3UTR       | 2047,2070      | 0.41 | -9.547  | 17           | –            | –       | –            |
| hsa-miR-198     | NM_022060  | ABHD4        | 1.00    | 3UTR       | 1425,1445      | 0.46 | -5.083  | 18           | –            | –       | –            |
| hsa-miR-198     | NM_022060  | ABHD4        | 1.00    | 3UTR       | 1991,2015      | 0.43 | -5.763  | 18           | –            | –       | –            |
| hsa-miR-199a-5p | NM_022060  | ABHD4        | 1.00    | 3UTR       | 2341,2362      | 0.34 | -6.983  | 19           | –            | –       | –            |
| hsa-miR-208a-5p | NM_022060  | ABHD4        | 0.92    | 5UTR       | 1,43           | 0.34 | -3.938  | 16           | –            | –       | –            |
| hsa-miR-208a-5p | NM_022060  | ABHD4        | 1.00    | CDS        | 632,649        | 0.4  | -9.22   | 16           | –            | –       | –            |
| hsa-miR-129-5p  | NM_022060  | ABHD4        | 0.92    | 3UTR       | 1743,1762      | 0.46 | -15.567 | 15           | –            | –       | –            |

**Figure S8:** ABHD4 mRNA is a direct target of miRNA-197-5p that was retrieved from miRWalk database (accessed on 1 June 2020). It shows direct interaction between miRNA-197-5p and ABHD4 mRNA.

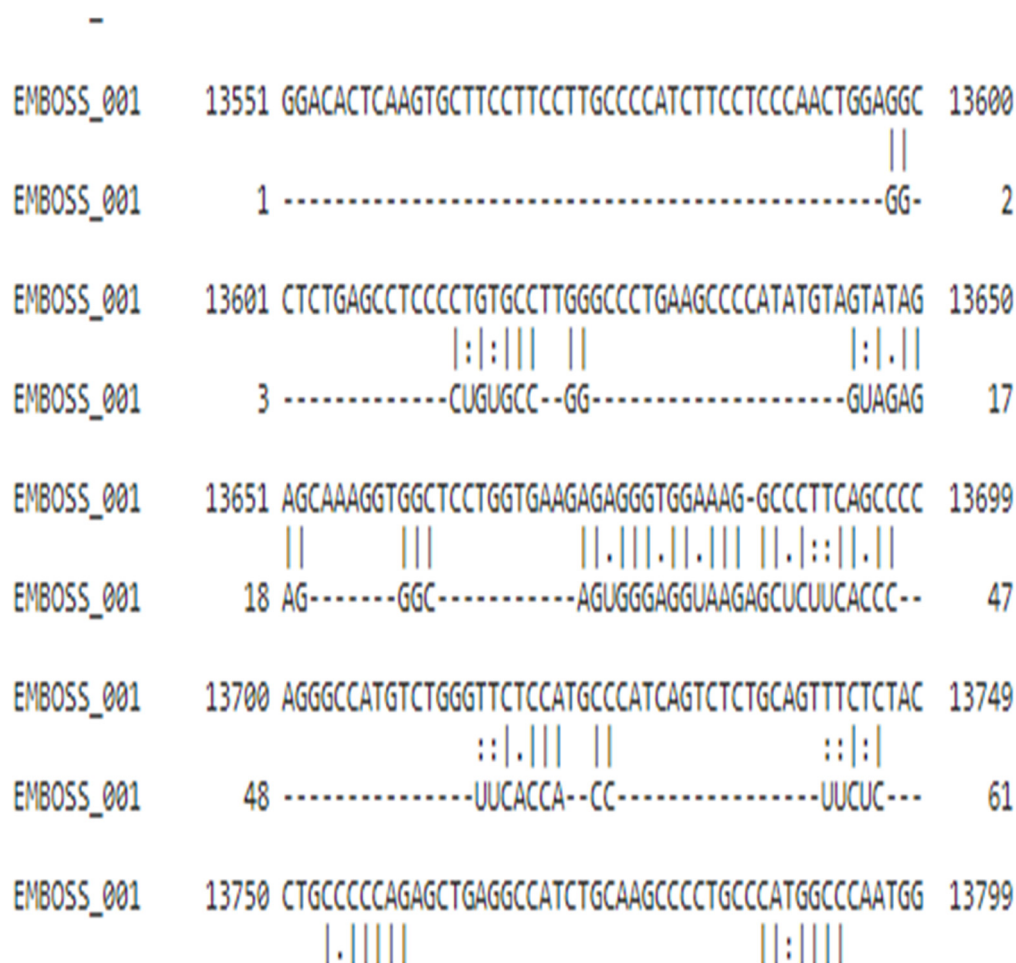

**Figure S9.** Alignment between ABHD4 mRNA and miRNA-197-5p that was performed using European bioinformatics institute database (accessed on 1 January 2021). It shows direct interaction between miRNA-197-5p and ABHD4 mRNA.

| Mirna $\Delta$    | Refseqid $\Delta$ | Genesymbol $\Delta$ | Score $\Delta$ | Position $\Delta$ | Binding Site $\Delta$ | Au $\Delta$ | Me $\Delta$ | N Pairings $\Delta$ | Targetscan $\Delta$ | Mirdb $\Delta$ | Mirtarbase $\Delta$ |
|-------------------|-------------------|---------------------|----------------|-------------------|-----------------------|-------------|-------------|---------------------|---------------------|----------------|---------------------|
| hsa-miR-216a-5p   | NM_022060         | ABHD4               | 0.81           | CDS               | 89,111                | 0.35        | -10.282     | 15                  | —                   | —              | —                   |
| hsa-miR-216a-3p   | NM_022060         | ABHD4               | 0.85           | CDS               | 292,314               | 0.41        | -10.37      | 20                  | —                   | —              | —                   |
| hsa-miR-217-5p    | NM_022060         | ABHD4               | 0.85           | 3UTR              | 2317,2350             | 0.38        | -6.338      | 19                  | —                   | —              | —                   |
| hsa-miR-218-2-3p  | NM_022060         | ABHD4               | 1.00           | 5UTR              | 10,54                 | 0.37        | -9.609      | 17                  | —                   | —              | —                   |
| hsa-miR-219a-1-3p | NM_022060         | ABHD4               | 0.81           | CDS               | 412,430               | 0.43        | -10.839     | 14                  | —                   | —              | —                   |
| hsa-miR-219a-1-3p | NM_022060         | ABHD4               | 0.85           | 3UTR              | 1450,1478             | 0.48        | -9.532      | 17                  | —                   | —              | —                   |
| hsa-miR-221-3p    | NM_022060         | ABHD4               | 0.92           | 3UTR              | 2016,2051             | 0.46        | -5.714      | 21                  | —                   | —              | —                   |
| hsa-miR-222-5p    | NM_022060         | ABHD4               | 0.85           | CDS               | 369,388               | 0.38        | -10.16      | 17                  | —                   | —              | —                   |
| hsa-miR-222-3p    | NM_022060         | ABHD4               | 0.85           | CDS               | 816,834               | 0.48        | -14.182     | 15                  | —                   | —              | —                   |
| hsa-miR-222-3p    | NM_022060         | ABHD4               | 0.85           | 3UTR              | 1455,1483             | 0.52        | -8.406      | 16                  | —                   | —              | —                   |

**Figure S10:** ABHD4 mRNA is a direct target of miRNA-221-3p that was retrieved from miRWalk database. (accessed on 1 June 2021). It shows direct interaction between miRNA-221-3p and ABHD4 mRNA.



```

EMBOSS_001      1 ----- 0
EMBOSS_001      8301 GGGCCGCTCCCAGGCCAGCTTGGGGCAGACAGTTGTTAGGAGATAAAAC 8350
EMBOSS_001      1 -----AGCU-----ACA-UUGU----- 11
EMBOSS_001      8351 TCTTAGCTGCTGGAGTTCTGGGCTTTATTTCTTCTTCAACAAAGCTCTGA 8400
EMBOSS_001      12 -----CUGCUGGGUUC----- 23
EMBOSS_001      8401 CTCAGTTAGGTAAACACAGGCACTAGCAAGCCTGATCATTTCCAGAGAGT 8450
EMBOSS_001      24 ----- 23
EMBOSS_001      8451 TCCCAGGGACAGACACAAAGGAATACAGAAGATAATAGATTAATTAAAC 8500
EMBOSS_001      24 ----- 23
EMBOSS_001      8501 ATGCTGCCCATCTCTAGAGGAAGGCCCTCCCTGTTCCCTACAGGTATGCA 8550
EMBOSS_001      24 ----- 23
EMBOSS_001      8551 ATTGGCCTGATGAACAAGAGTCTGGAAAATATTAATATTTTAAAGATTT 8600
EMBOSS_001      24 ----- 23
EMBOSS_001      8601 TTTTAACTGAAAAATTGATACAAACATGGTATTTTTTTCTTTTTTAGG 8650
EMBOSS_001      24 ----- 23
EMBOSS_001      8651 TCAAAAATAATTAGCAAAAACATGATATTTTCAAAGGAAAGGAAGTCT 8700

```

**Figure S11.** Alignment between ABHD4 mRNA and miRNA-221-3p that was performed using European bioinformatics institute database (accessed on 1 June 2021). It shows direct interaction between miRNA-221-3p and ABHD4 mRNA.

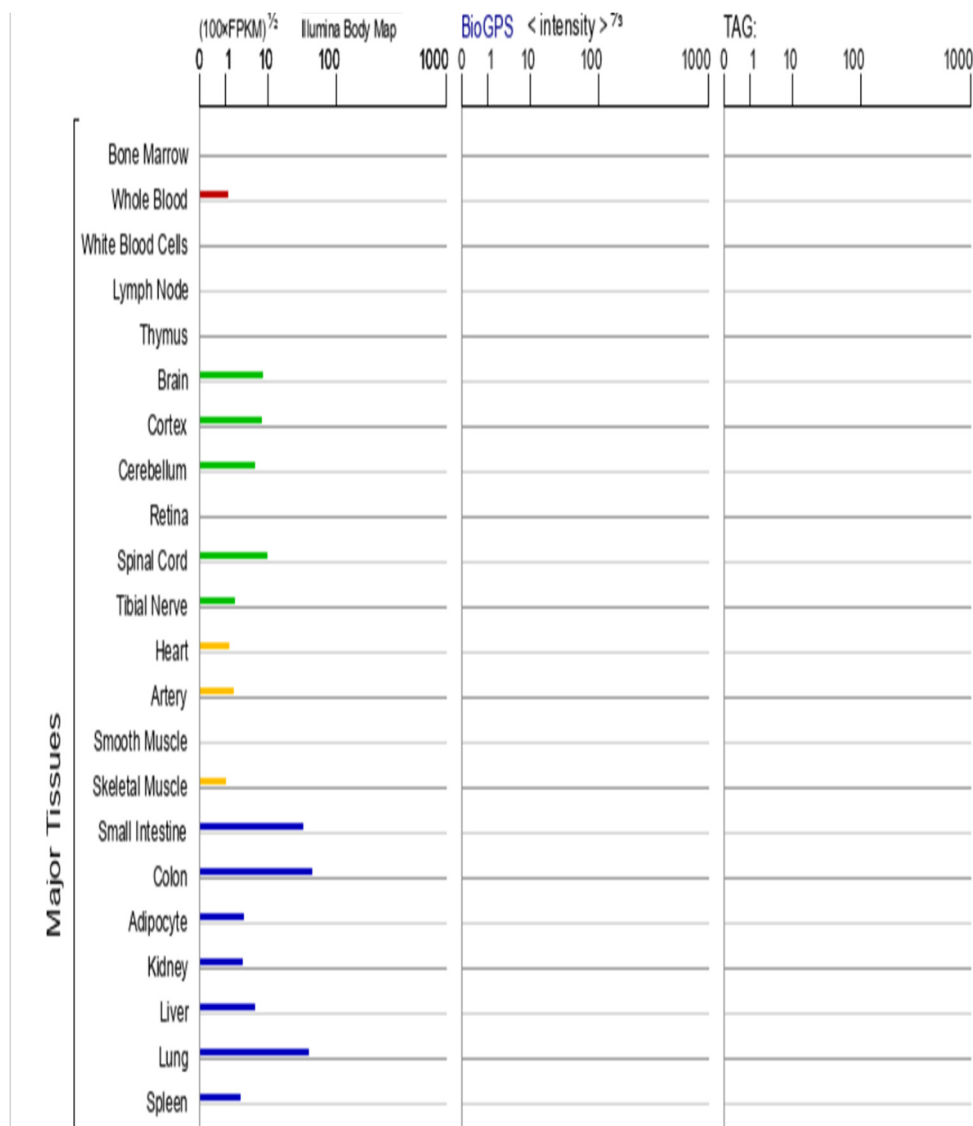

**Figure S12.** Gene expression of FENDRR lncRNA in heart that was retrieved from GeneCards®: The Human Gene Database. Available at (<https://www.genecards.org/cgi-bin/carddisp.pl?gene=FENDRR&keywords=FENDRR,lncRNA>, accessed on 1 June 2021) It shows the basal expression of FENDRR lncRNA in normal heart. X-axis represents level of RNA expression while Y-axis represents the tissue in which the gene is expressed.

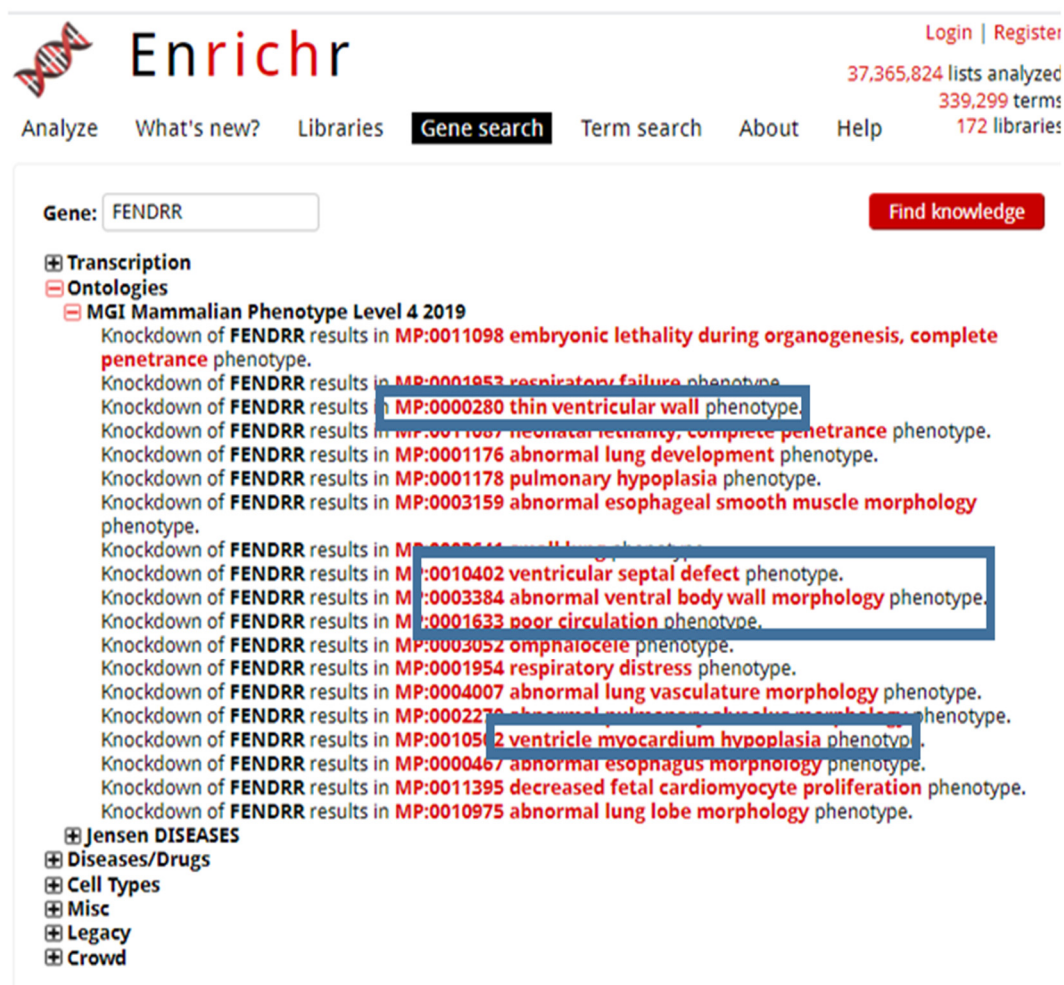

**Enrichr** Login | Register  
37,365,824 lists analyzed  
339,299 terms  
172 libraries

Analyze What's new? Libraries **Gene search** Term search About Help

Gene:  **Find knowledge**

**Transcription**  
**Ontologies**  
**MGI Mammalian Phenotype Level 4 2019**  
Knockdown of **FENDRR** results in **MP:0011098 embryonic lethality during organogenesis, complete penetrance** phenotype.  
Knockdown of **FENDRR** results in **MP:0001953 respiratory failure** phenotype.  
Knockdown of **FENDRR** results in **MP:0000280 thin ventricular wall** phenotype.  
Knockdown of **FENDRR** results in **MP:0011087 neonatal lethality, complete penetrance** phenotype.  
Knockdown of **FENDRR** results in **MP:0001176 abnormal lung development** phenotype.  
Knockdown of **FENDRR** results in **MP:0001178 pulmonary hypoplasia** phenotype.  
Knockdown of **FENDRR** results in **MP:0003159 abnormal esophageal smooth muscle morphology** phenotype.  
Knockdown of **FENDRR** results in **MP:0003544 small lung** phenotype.  
Knockdown of **FENDRR** results in **MP:0010402 ventricular septal defect** phenotype.  
Knockdown of **FENDRR** results in **MP:0003384 abnormal ventral body wall morphology** phenotype.  
Knockdown of **FENDRR** results in **MP:0001633 poor circulation** phenotype.  
Knockdown of **FENDRR** results in **MP:0003052 omphalocele** phenotype.  
Knockdown of **FENDRR** results in **MP:0001954 respiratory distress** phenotype.  
Knockdown of **FENDRR** results in **MP:0004007 abnormal lung vasculature morphology** phenotype.  
Knockdown of **FENDRR** results in **MP:0002276 abnormal pulmonary vasculature morphology** phenotype.  
Knockdown of **FENDRR** results in **MP:0010512 ventricle myocardium hypoplasia** phenotype.  
Knockdown of **FENDRR** results in **MP:0000467 abnormal esophagus morphology** phenotype.  
Knockdown of **FENDRR** results in **MP:0011395 decreased fetal cardiomyocyte proliferation** phenotype.  
Knockdown of **FENDRR** results in **MP:0010975 abnormal lung lobe morphology** phenotype.

**Jensen DISEASES**  
**Diseases/Drugs**  
**Cell Types**  
**Misc**  
**Legacy**  
**Crowd**

**Figure S13.** Gene expression of FENDRR lncRNA in heart that was retrieved from Enricher tool database. Available at <https://maayanlab.cloud/Enrichr/> (accessed on 1 June 2021). It shows the FENDRR lncRNA relation to different cardiac disorders.



|           |        |                         |   |      |
|-----------|--------|-------------------------|---|------|
| FENDRR:15 | FENDRR | chr16:86487716-86490879 | - | 2825 |
| FENDRR:16 | FENDRR | chr16:86487706-86490879 | - | 2835 |
| FENDRR:17 | FENDRR | chr16:86474539-86477993 | - | 2138 |
| FENDRR:18 | FENDRR | chr16:86490183-86508886 | - | 563  |
| FENDRR:19 | FENDRR | chr16:86490268-86508886 | - | 969  |
| FENDRR:2  | FENDRR | chr16:86490268-86508877 | - | 960  |
| FENDRR:20 | FENDRR | chr16:86474529-86508886 | - | 3121 |
| FENDRR:21 | FENDRR | chr16:86474623-86508886 | - | 3211 |
| FENDRR:22 | FENDRR | chr16:86474623-86508886 | - | 3606 |
| FENDRR:23 | FENDRR | chr16:86478011-86508886 | - | 731  |
| FENDRR:24 | FENDRR | chr16:86487737-86508886 | - | 2630 |
| FENDRR:25 | FENDRR | chr16:86473638-86498552 | - | 4093 |
| FENDRR:26 | FENDRR | chr16:86474623-86498552 | - | 3164 |

**Figure S14.** FENDRR lncRNA detailed isoform that was retrieved from LNCipedia database, (accessed on 1 June 2021). It presents the details of FENDRR lncRNA isoforms.

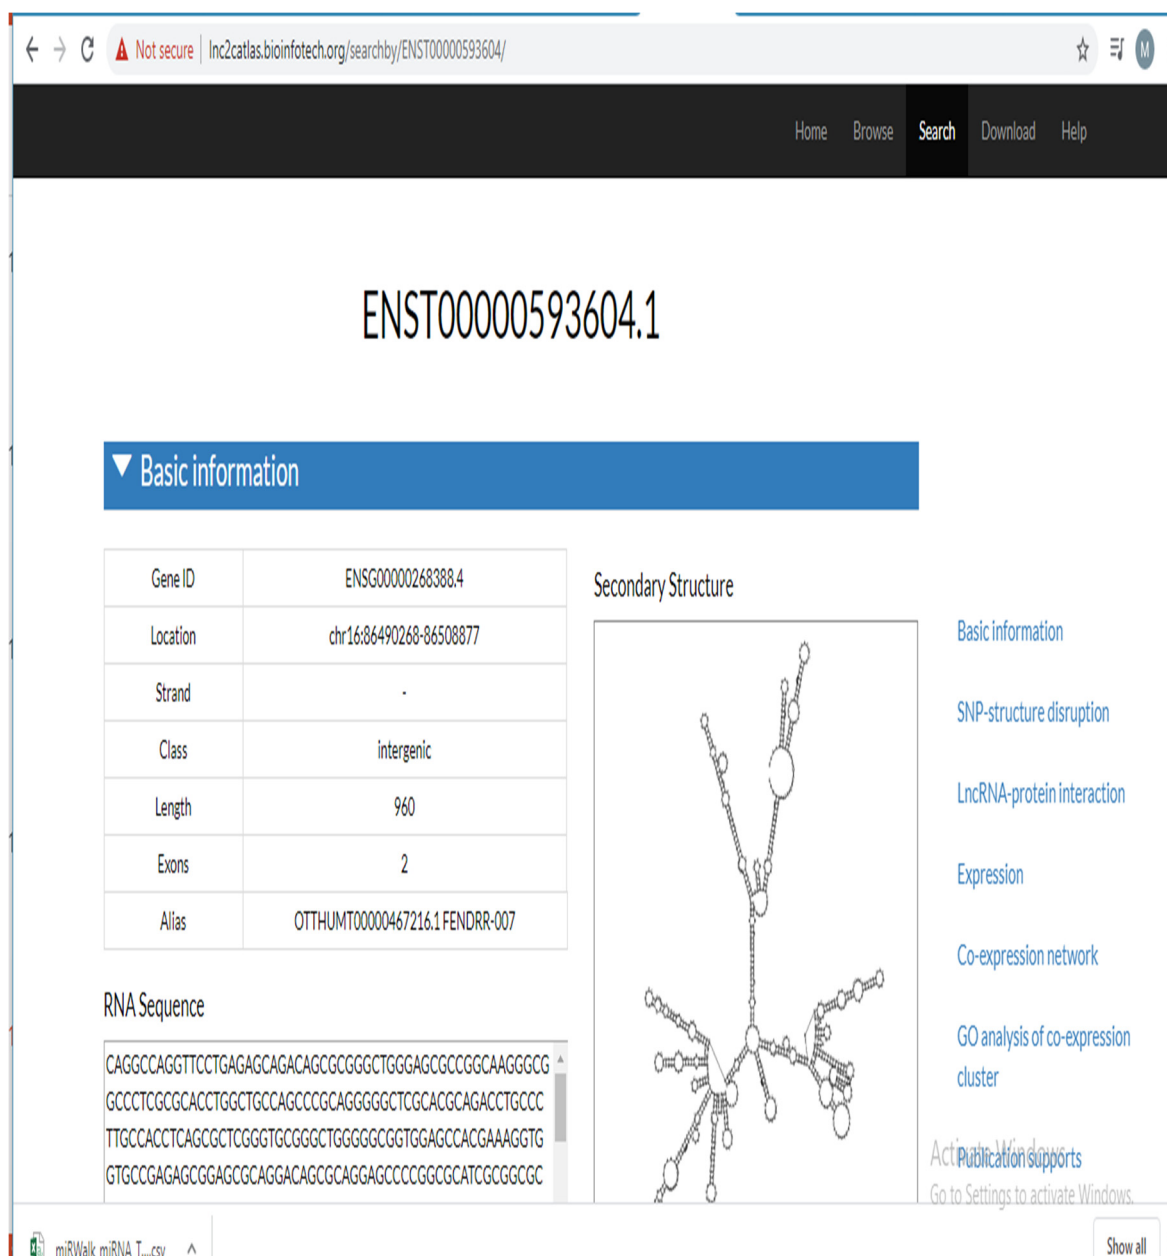

**Figure S15.** FENDRR lncRNA structure that was retrieved from Lnc2atlas database (accessed on 1 June 2021). It presents the detailed structure of FENDRR lncRNA.

```

EMBOSS_001      151 GACTGTCTGTGGCTGAGGAACAGTTGTAGACACCTTCCCCTCTTCCTTT      200
EMBOSS_001      1  ----- 0
EMBOSS_001      201 TCCAGGTCGGCCTCCGGGAG----GGCGGGGGTGGGTGCGTTGCTTG      245
EMBOSS_001      1  --CAGGCCAGGTTCTGTAGAGCAGACGCGGGCTGGGAGCG----- 41
EMBOSS_001      246 CTTTGCATTGCCCAG-AAGAGGCAGC-----GGCTG--AGCC      280
EMBOSS_001      42 -----CCGGCAAG-GGCGGCCCTCGCGCACCTGGCTGCCAGCC      78
EMBOSS_001      281 TGGGGAGCCATGGGAGACGCGCTCGCCGCGAGCCGGGGATCTGGCTTT      330
EMBOSS_001      79 CG-----CAGGGG-----GCTCGCAGCAGACCTG---CC---CTTG      109
EMBOSS_001      331 CTACCTTAGTCTCGCGAGTGCCCTCATTCTCTCTGGCCTCTGGAGAG      380
EMBOSS_001      110 CCACCTCAG--CGCTCGGTGC-----GGCTGGGG--- 138
EMBOSS_001      381 ATTCCATGTTGATGTGTGAGATCCCGAAAGCAAGCTTGTGGGACGCGGG      430
EMBOSS_001      139 -----GCGGTG---GAGCCACGAAAG-----GTGGTGC-CGAG      167
EMBOSS_001      431 TGCGGAG-GTAG--CAGC-CAGGCGTGCTCGTCTCGACTTGCCCCCAGA      476
EMBOSS_001      168 AGCGGAGCGCAGGACAGCGCAGGAG-----CCCCGG- 198
EMBOSS_001      477 ACGGCAGTCGTGGGGATGGAGAGAGCCTCCTCCCTCCGCCCGGCAAGA-      525
EMBOSS_001      199 --CGCA-TCGCGG-----CGC---GCACAGAC      219
EMBOSS_001      526 -GAAGATGTGGAGAGACTGGAGAGGTCTCCATCGCGCTGAAAT----- 567
EMBOSS_001      220 CCAGGATTG-----TGAAGAGGTGACC-----CAAATTTCAAGA      254

```

**Figure S16.** Alignment between ABHD4 mRNA and FENDRR lncRNA that was performed using European bioinformatics institute database (accessed on 1 June 2021). It shows putative interaction between ABHD4 mRNA and FENDRR.



```

EMBOSS_001      1 ----- 0
EMBOSS_001    451 GGCAGATAGGGGTTGGTTATCCTATTGTCTTTACTTTTCATATATTTTATT 500
EMBOSS_001      1 ----- 0
EMBOSS_001    501 TTTTCTGTAATAAAACAAATTAAATCACCTGTCGTGACCTCACAGGGGC 550
EMBOSS_001      1 ----- 0
EMBOSS_001    551 CAGTGTGGGTTGTGGCGTGAGGCAGGAAGCTCTGCAGAGTTCCTTGGTCA 600
EMBOSS_001      1 ----- 0
EMBOSS_001    601 AAAGGATTAATTACAAAAGAACTCCATGAACACCGAGAAGAAGAGAAGGG 650
EMBOSS_001      1 ----- 0
EMBOSS_001    651 AATCCTGGCATTAAAGCCACAAAGAACTTGATATGGTCTTGTCTCTCT- 699
EMBOSS_001      1 -----AGCUACA-----UUGUCUGCUG 17
EMBOSS_001    700 --TCTCTCAATTGACAGTGAGAACTGAAGACCAGAGAGGGTGAGTGGTT 747
EMBOSS_001    18 GGUUUC----- 23
EMBOSS_001    748 TACTCAGTTTGGCACAACCTGACCCCAACCTAGCCCTCCATGAGGACTGAG 797
EMBOSS_001    24 ----- 23
EMBOSS_001    798 CGCATGAGAGATCCTGAGCCACAGCCGCCAGCCCTGCTCCTCTCGAATT 847
EMBOSS_001    24 ----- 23
EMBOSS_001    848 TCTGACCTACAGGAAGTGAAGAAGTAATGAAAGACTGCTGTTTAAAGCC 897

```

**Figure S17.** Alignment between hsa-miRNA-221-3p and FENDRR lncRNA that was performed using European bioinformatics institute database (accessed on 1 January 2021). It shows putative interaction between hsa-miRNA-221-3p and FENDRR.

| Query  | Length_Query | Target         | Length_Target | dG    | ndG     | Start_Position_Query | End_Position_Query | Start_Position_Target | End_Position_Target |
|--------|--------------|----------------|---------------|-------|---------|----------------------|--------------------|-----------------------|---------------------|
| FENDRR | 969          | hsa-miR-221-3p | 23            | -7.25 | -0.4833 | 234                  | 256                | 1                     | 23                  |

  

| Query                         | Length_Query                                                                                                                                                                                                                                                                                                                                                                                                                                                                                                                                                                                                                                                                                                                                                                                                                                                                                                                                                    | Target              | Length_Target | dG    | ndG     | Start_Position_Query | End_Position_Query |
|-------------------------------|-----------------------------------------------------------------------------------------------------------------------------------------------------------------------------------------------------------------------------------------------------------------------------------------------------------------------------------------------------------------------------------------------------------------------------------------------------------------------------------------------------------------------------------------------------------------------------------------------------------------------------------------------------------------------------------------------------------------------------------------------------------------------------------------------------------------------------------------------------------------------------------------------------------------------------------------------------------------|---------------------|---------------|-------|---------|----------------------|--------------------|
| Start_Position_Target         |                                                                                                                                                                                                                                                                                                                                                                                                                                                                                                                                                                                                                                                                                                                                                                                                                                                                                                                                                                 | End_Position_Target |               |       |         |                      |                    |
| FENDRR                        | 969                                                                                                                                                                                                                                                                                                                                                                                                                                                                                                                                                                                                                                                                                                                                                                                                                                                                                                                                                             | hsa-miR-221-3p      | 23            | -7.25 | -0.4833 | 234                  | 256                |
| 5'                            | ACTGCGCCAGGCGGCTTCCTGAGAGCAGAGCGGCTGGGAGCGCCAGGCGGCTTCGCGACCTGGCTGCCAGCCGACAGGCGCTCGCAGCAGACCTGCCCTTCCACCTCAGCGCTCGGCTGCGGCTGGGCGGCTGGGAGCCACGAAAGGTGGTGGCAGAGCGGAGCGGAG<br>GACAGCGCAGAGGCGGCGGCGCATCGCGGCGGCGCAGAGCCAGGATTTGTGAAGAGGTGACCCAAATTTCAAGACAATGTTGGATGCAAGGATTTGCCAGCAACTGCATCACTGCAAAACAGCTCTGCCCGTGTCTCCGAGATACCAAGTGAATACATGATGGGATTTACATCTGAA<br>AAACCAAGGCAAGAGGCGCATGGGAAAGGAGGAGGTGGAGCAGGACTGGACAGAGCTGATAAATGGTTGTGCTGAGTACTGGGCGAGATAGGGGTTGGTTATCCTATTGTCTTTACTTTTCATATATTTTATTTTCTGTAATAAAACAAATTAATACCTGCTGAGCTCACAGGCGCAGTG<br>TGGGTTGTGGGCTGAGGCGAGGAGCTCTGAGAGTTCCTTGGTCAAAAGGATTAATTACAAAAGAACTCCATGAACACCGAGAGAGAGAGAGGGAATCCTGGCATTAAAGCCACAAAGAACTTGATATGGTCTTGTCTCTCTCTCAATTGACAGTGAGAACTGAAGACGAGAGGAGT<br>GGTCTACTCAGTTTGGCACAACCTGACCCCAACCTGACCCCTCCATGAGGACTGAGCGCATGAGAGATCCTGAGCCACAGCGCCAGCCCTGCTCTCGAATTTCTGACCTACAGGAAGTGAAGAAGTGAAGAAGTGTCTTTAAAGCCATGCTTTTGGCATGTTTGTATGAGTGTGA<br>GATAACGAGAAACATCGGATTTACATTT 3' |                     |               |       |         |                      |                    |
| .....  ..       .             |                                                                                                                                                                                                                                                                                                                                                                                                                                                                                                                                                                                                                                                                                                                                                                                                                                                                                                                                                                 |                     |               |       |         |                      |                    |
| 3' AGCTACATTGTCTGCTGGGTTTC 5' |                                                                                                                                                                                                                                                                                                                                                                                                                                                                                                                                                                                                                                                                                                                                                                                                                                                                                                                                                                 |                     |               |       |         |                      |                    |

**Figure S18.** Alignment between hsa-miRNA-221-3p and FENDRR lncRNA that was performed using LncTar: an efficient tool for predicting RNA targets of lncRNAs (<http://www.cuilab.cn/lncTar>, accessed on 1 January 2021). It shows putative interaction between hsa-miRNA-221-3p and FENDRR.

```

EMBOSS_001      1 --CAG-GCCAGGTTCTCTGAGAGCAGACAGCGCGGGCTGGGAGCGCCGGCA 47
                  |.| |||.||: ||||..|.|| :||| ||.|
EMBOSS_001      1 GGCUGUGCCGGU-----AGAGAGGGCAG-----UGGGA----GGUA 33

EMBOSS_001      48 AGGG-----CGGCCCTCGCGCACCTGGCTGCCAGCCCGCAGGGGGCTCGC 92
                  ||.| |..||:|.|| ||||: .|: |||.||.|||||
EMBOSS_001      34 AGAGCUCUUCACCCUUCAC-CACCU-UCU-CCACCAGCAUGG----- 73

EMBOSS_001      93 ACGCAGACCTGCCCTTGCCACCTCAGCGCTCGGGTGGGGCTGGGGGCGG 142
                  ||
EMBOSS_001      74 -----CC----- 75

EMBOSS_001      143 TGGAGCCACGAAAGTGGTCCGAGAGCGGAGCGCAGGACAGCGCAGGAG 192

```

**Figure S19.** Alignment between hsa-miRNA-197-5p and FENDRR lncRNA that was performed using European bioinformatics institute database (accessed on 1 January 2021). It shows putative interaction between hsa-miRNA-197-5p and FENDRR.

| Query  | Length_Query | Target         | Length_Target | dG    | ndG     | Start_Position_Query | End_Position_Query | Start_Position_Target | End_Position_Target |
|--------|--------------|----------------|---------------|-------|---------|----------------------|--------------------|-----------------------|---------------------|
| FENDRR | 969          | hsa-miR-197-5p | 23            | -8.44 | -1.4067 | 311                  | 333                | 1                     | 23                  |

  

| Query  | Length_Query | Target         | Length_Target | dG    | ndG     | Start_Position_Query | End_Position_Query |
|--------|--------------|----------------|---------------|-------|---------|----------------------|--------------------|
| FENDRR | 969          | hsa-miR-197-5p | 23            | -8.44 | -1.4067 | 311                  | 333                |

5'

ACTGCGCGCCAGGCCAGGTTCTTGAGAGCAGACAGCGCGGGCTGGGAGCGCCGCAAGGGCGGCCCTCGCGCACCTGGCTGCGAGCCGCGAGGGGCTGCGACGCACTGCCCCCTTGCCACCTCAGCGCTCGGGTGGCGGGCTGGGGGCGGTGGAGCCACGAAAGTGGTGGAGCGGAGCGCGAGGACGCGCAGGAGCGCCCGCGCATCGCGCGCGCAGACCCAGGATTTGTGAAGAGGTGACCCAAATTTCAAGACAATGTTGGATGCAACGGATTTGCGACCACTGATCACTGTCAAAACAGCTCTGCCGTGTCTCCGAAGATACCAAGTGAATACATGTAGATGGGATTTACATCTGAA

AAACCAAGGCAAGAGGCCATGGGAAGGAGCGAGGTGGAGCAGGACTGGACAGAGCTGATAAATGGTTGTGCTGAGTACTGGGCGAGATAGGGGTGATCCATTGCTTTACTTTTCATATATTTATTTTCTGTAATAAAACAAATTAAGATCACTGTGCTGACCTCAGAGGGGCCAGTG

TGGGTTGTGGCGTGAGGCGAGGAGCTCTGAGAGTTCTTGGTCAAAAGATTAAATACAAAAGAACTCCATGAACACCGAGAGAGAGAGAGGGAATCCTGGCATTAAAGCCACAAAGAACTTGATATGGTCTTGTCTCTCTCAATTGACAGTGAGAACTGAAGACAGAGAGGGTGAGT

GGTTTACTCAGTTTGGCACAACCTGACCCCAACCTAGCCCTCCATGAGGACTGAGGCGATGAGAGATCCTGAGCCACAGCCGCCAGCCCTGCTCTCGAATTTCTGACCTACAGAACTGCAAGAAGTAAAGAAAGACTGCTGTTAAAGCCACTGCATTTTGGCATGTTTGTATGAGTCGTA

GATAACCAAGAAACATCGATTACATTT 3'

.....|||||.....|||

3' GGAGGGTGACGGGAGAGATGGGC 5'

**Figure S20** Alignment between hsa-miRNA-197-5p and FENDRR lncRNA that was performed using LncTar: an efficient tool for predicting RNA targets of lncRNAs (<http://www.cuilab.cn/lncTar>, accessed on 1 January 2021). It shows putative interaction between hsa-miRNA-197-5p and FENDRR.
